# Supplementary material for: Hedgehog Pathway Inhibition Hampers Sphere and Holoclone Formation in Rhabdomyosarcoma
Source: Hindawi journal article supplement (doi:10.1155/2017/7507380), 2017-01-01
Supplement: f1 [file 7507380.f1.pdf]

## Supplementary Figure legends

**Supplementary figure 1. The genetic downregulation of *HH* ligands and *GLI1* reduced neither clonogenicity nor sphere formation.** Percentage of total colonies (**A** and **B**) and spheres (**C** and **D**) formed by *SHH*, *IHH*, *DHH* and *GLI1* shRNA-expressing cells (CW9019 and HTB82). Values were referred to control cells (transfected with pGIPZ empty vector) and expressed as mean  $\pm$  SEM of three independent experiments.

**Supplementary figure 2. Pretreatment with Sonidegib and MEDI-5304 reduced neither clonogenicity nor cell viability.** Percentage of total colonies (**A** and **B**) and cell viability (**C** and **D**) after HH pathway inhibitor treatment in CW9019 and HTB82 cell lines, respectively. Values were referred to control cells (treated with vehicle) and expressed as mean  $\pm$  SEM of three independent experiments.

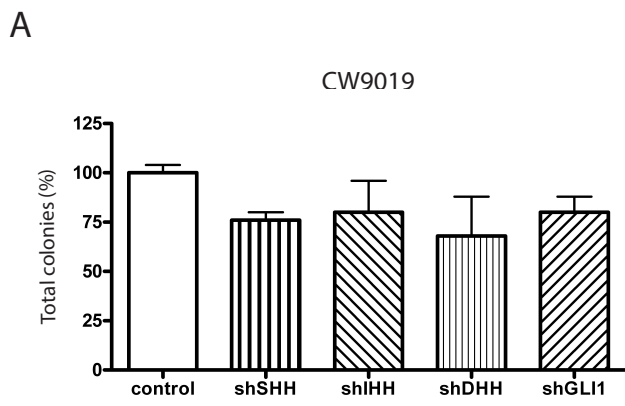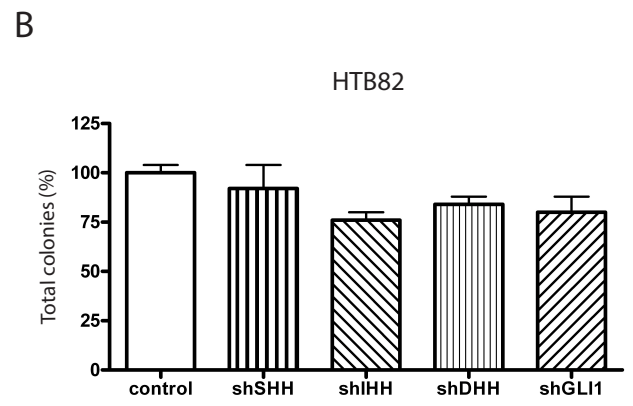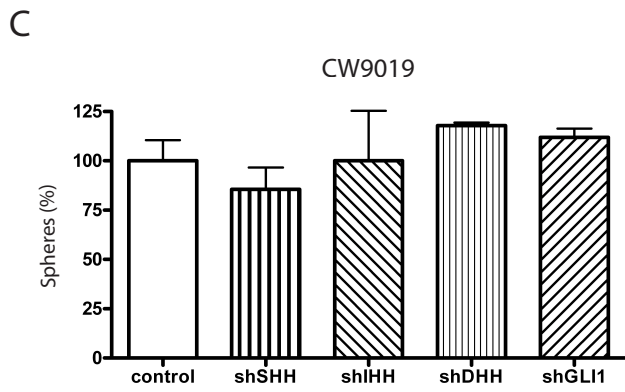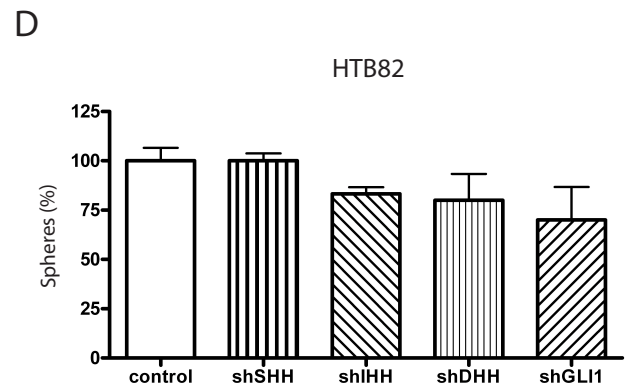

Figure S1

A

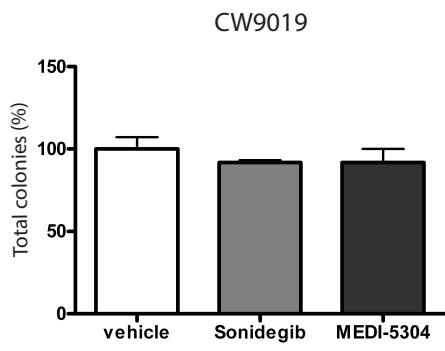

B

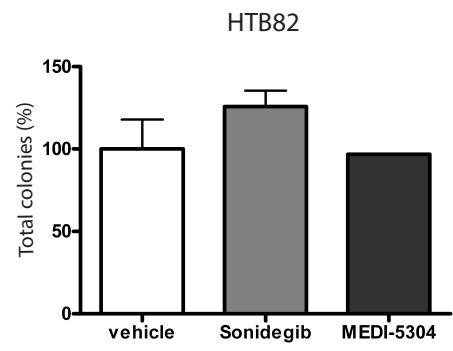

C

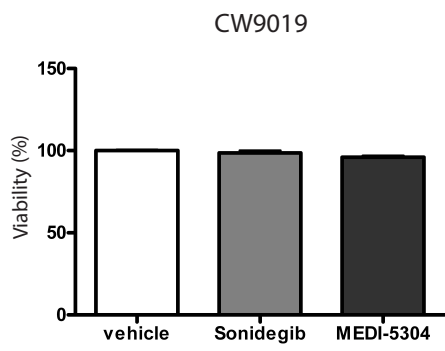

D

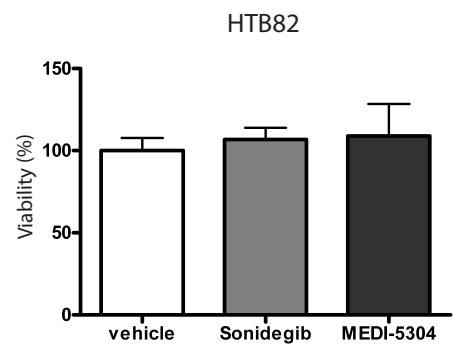

Figure S2
